# Supplementary material for: Intestine specific regulation of pig cytidine-5′-monophospho-N-acetylneuraminic acid hydroxylase gene for N-glycolylneuraminic acid biosynthesis
Source: PubMed Central journal article supplement (PMC6414617; doi:10.1038/s41598-019-40522-9), 2019-03-12

# CERTIFICATE OF EDITING

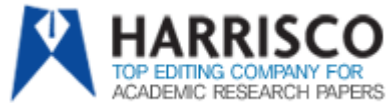

*Scientific English Research Paper Editing Service*  
1108, Hwanghwa B/D, 832-7, Yeoksam-Dong Kangnam-Ku  
Seoul, the Republic of Korea  
Tel : 82-2-557-1810~1  
<http://en.harrisco.net>

The following manuscript was proofread and edited by  
the professional English editors at HARRISCO.

## **Manuscript Title :**

Intestine specific regulation of pig cytidine-5â€™-monophospho-N-acetylneuraminic acid hydroxylase gene  
for N-glycolylneuraminic acid biosynthesis

## **Manuscript Authors :**

KIM, CHEORL-HO

## **Date of Issue: :**

February 01, 2019

Yours truly,

HARRISCO

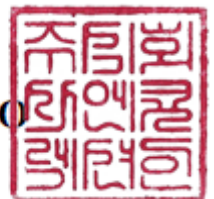

Supplement: 41598_2019_40522_MOESM1_ESM.pdf [file 41598_2019_40522_MOESM1_ESM.pdf]
